# Supplementary material for: Adsorption-geometry induced transformation of self-assembled nanostructures of an aldehyde molecule on Cu(110)
Source: Royal Society of Chemistry journal article supplement (doi:10.1039/c4nr03754e), 2014-01-01
Supplement: c4nr03754e1.pdf [file c4nr03754e1.pdf]

**Adsorption-geometry induced transformation of self-  
assembled nanostructures of an aldehyde molecule on**

**Cu(110)**

*Supporting information*

**Chi Zhang,<sup>†</sup> Qiang Sun,<sup>†</sup> Kai Sheng, Qinggang Tan, and Wei Xu\***

*College of Materials Science and Engineering, Tongji University, Caoan Road 4800, Shanghai  
201804, P. R. China*

E-mail: [xuwei@tongji.edu.cn](mailto:xuwei@tongji.edu.cn)

<sup>†</sup>authors contributed equally

Figure S1. STM images showing the formation of different self-assembled nanostructures after deposition of BA molecules at different coverages: (a)  $\sim 0.7$  ML; (b)  $\sim 0.8$  ML; (c)  $\sim 1$  ML on the Cu(110) substrate held at RT. Scanning conditions:  $I_t = 1.24$  nA,  $V_t = -2100$  mV.

Figure S2. The STM image showing different tip state of the close-packed nanostructure at a high coverage. Scanning conditions:  $I_t = 0.83$  nA,  $V_t = -2500$  mV.

Figure S3. (a)-(c) The close-up STM images showing the close-packed nanostructures in which different ratios of adsorption geometries of BA molecules can be identified. (d)-(f) The corresponding gas-phase optimized structural models, respectively. The blue dot lines indicate the C-H $\cdots$ O hydrogen bonds. Scanning conditions:  $I_t = 1.24$  nA,  $V_t = -2100$  mV.

Figure S4. STM image showing the coexistence of different close-packed nanostructures with different ratios of the adsorption geometries in the same domain. Scanning conditions:  $I_t = 0.70$  nA,  $V_t = -2500$  mV.
